# Supplementary material for: Assessing the Long-Term (48-Week) Effectiveness, Safety, and Tolerability of Fremanezumab in Migraine in Real Life: Insights from the Multicenter, Prospective, FRIEND3 Study
Source: Springer Nature journal article supplement (doi:10.1007/s40120-024-00591-z), 2024-03-07
Supplement: MOESM1 [file 26829938]

## SUPPLEMENTARY MATERIALS

### **Assessing the long-term (48 weeks) effectiveness, safety, and tolerability of fremanezumab in migraine in real-life: insights from the multicenter, prospective, FRIEND3 study**

Piero Barbanti<sup>1,2\*</sup>, Gabriella Egeo<sup>1\*</sup>, Stefania Proietti<sup>3</sup>, Florindo d'Onofrio<sup>4</sup>, Cinzia Aurilia<sup>1</sup>, Cinzia Finocchi<sup>5</sup>, Laura Di Clemente<sup>6</sup>, Maurizio Zucco<sup>6</sup>, Alberto Doretti<sup>7</sup>, Stefano Messina<sup>7</sup>, Massimo Autunno<sup>8</sup>, Angelo Ranieri<sup>9</sup>, Antonio Carnevale<sup>10</sup>, Bruno Colombo<sup>11</sup>, Massimo Filippi<sup>11</sup>, Miriam Tasillo<sup>12</sup>, Steno Rinalduzzi<sup>12</sup>, Pietro Querzani<sup>13</sup>, Giuliano Sette<sup>14</sup>, Lorenzo Forino<sup>4</sup>, Francesco Zoroddu<sup>15</sup>, Micaela Robotti<sup>16</sup>, Alessandro Valenza<sup>17</sup>, Cecilia Camarda<sup>18</sup>, Laura Borrello<sup>19</sup>, Marco Aguggia<sup>20</sup>, Giovanna Viticchi<sup>21</sup>, Carlo Tomino<sup>22</sup>, Giulia Fiorentini<sup>2</sup>, Bianca Orlando<sup>1</sup>, Stefano Bonassi<sup>23</sup> and Paola Torelli<sup>24</sup>, for the *Italian Migraine Registry study group*.

\* Piero Barbanti and Gabriella Egeo made equal contributions to this work.

<sup>1</sup>Headache and Pain Unit, IRCCS San Raffaele, Rome, Italy.

<sup>2</sup>San Raffaele University, Rome, Italy.

<sup>3</sup>Clinical and Molecular Epidemiology, IRCCS San Raffaele, Rome, Italy; Department of Human Sciences and Quality of Life Promotion, San Raffaele University, Rome, Italy.

<sup>4</sup>Neurology Unit, San Giuseppe Moscati Hospital, Avellino, Italy.

<sup>5</sup>Neurology Unit, San Paolo Hospital, ASL 2 Savona, Italy.

<sup>6</sup>Headache Center, Neurology Unit, San Camillo-Forlanini Hospital, Rome, Italy.

<sup>7</sup>Department of Neurology-Stroke Unit, Laboratory of Neuroscience, Istituto Auxologico Italiano, IRCCS, Milano, Italy.

<sup>8</sup>Department of Clinical and Experimental Medicine, University of Messina, Italy.

<sup>9</sup>Neurology Unit and Stroke-Unit, AORN A. Cardarelli, Napoli, Italy.

<sup>10</sup>Headache Center, Neurology Unit, San Filippo Neri Hospital, Rome, Italy.

<sup>11</sup>Headache Unit, Department of Neurology, Scientific Institute San Raffaele Hospital, Vita-Salute University, Milan, Italy.

<sup>12</sup>Stroke Unit, S. Camillo de Lellis Hospital, Rieti, Italy.

<sup>13</sup>Neurology Unit, S. Maria Delle Croci Hospital-AUSL Romagna, Ravenna, Italy.

<sup>14</sup>Department of Neuroscience, Mental Health and Sensory Organs (NESMOS), "Sapienza" University of Rome, Sant'Andrea University Hospital, Rome, Italy.

<sup>15</sup>Pediatric Headache Center, Neurology Unit, University of Sassari, Italy.

<sup>16</sup>Headache Center, ASST Santi Paolo Carlo, Milan, Italy.

<sup>17</sup>Headache Center, UOC Neurology, Ospedale Belcolle, Viterbo, Italy

<sup>18</sup>Department of Biomedicine, Neurosciences, and Advanced Diagnostics, University of Palermo, Palermo, Italy

<sup>19</sup>Frosinone Hospital, Headache Center, Frosinone, Italy

<sup>20</sup>Neurology and Stroke Unit, Cardinal Massaia Hospital, Asti, Italy.

<sup>21</sup>Neurological Clinic, Marche Polytechnic University, Ancona, Italy.

<sup>22</sup>Scientific Direction IRCCS San Raffaele, Rome, Italy

<sup>23</sup>Clinical and Molecular Epidemiology, IRCCS San Raffaele Roma, Italy; Department of Human Sciences and Quality of Life Promotion, San Raffaele University, Rome, Italy

<sup>24</sup>Neurology Unit, Department of Medicine and Surgery, Headache Center, University of Parma, Parma, Italy

**Corresponding author:**

Piero Barbanti, MD, PhD,

Headache and Pain Unit, IRCCS San Raffaele,

Via della Pisana 235 - 00163 Rome, Italy.

Email: [piero.barbanti@sanraffaele.it](mailto:piero.barbanti@sanraffaele.it); [peterbrondi@gmail.com](mailto:peterbrondi@gmail.com)

Phone: + 39 06 5225 4026

**Supplemental Table 1:** Change in monthly migraine days (MMD), monthly headache days (MHD), monthly analgesic medications (MAM), Numerical Rating Scale (NRS) score, Headache Impact Test-6 (HIT-6) score, and Migraine Disability Assessment Scale (MIDAS) score from baseline to weeks 9-12 and 21-24.

| <b>Variable</b>    | <b>HFEM (n=49)</b> | <b>CM (n=81)</b> |
|--------------------|--------------------|------------------|
| <b>MMD/MHD</b>     |                    |                  |
| <i>Baseline</i>    | 11.1±1.8           | 20.4±6.0         |
| <i>weeks 12</i>    | 4.2±3.5            | 6.7±5.6          |
| <i>weeks 24</i>    | 4.3±3.7            | 6.5±5.8          |
| <i>weeks 48</i>    | 4.7±4.0            | 5.9±4.9          |
| <i>Mean change</i> |                    |                  |
| <i>weeks 12</i>    | -6.9±3.8**         | -13.7±7.1**      |
| <i>weeks 24</i>    | -6.9±4.0**         | -14.0±7.3**      |
| <i>weeks 48</i>    | -6.4±4.4**         | -14.5±6.9**      |
| <b>MAM</b>         |                    |                  |
| <i>Baseline</i>    | 11.7±2.9           | 22.1±8.5         |
| <i>weeks 12</i>    | 4.6±7.2            | 6.1±5.1          |
| <i>weeks 24</i>    | 4.2±3.6            | 6.1±6.0          |
| <i>weeks 48</i>    | 5.7±9.4            | 5.6±4.9          |
| <i>Mean change</i> |                    |                  |
| <i>weeks 12</i>    | -7.1±7.6**         | -16.0±9.2**      |
| <i>weeks 24</i>    | -7.5±4.4**         | -16.4±9.1**      |
| <i>weeks 48</i>    | -6.0±9.6**         | -16.5±8.9**      |
| <b>NRS</b>         |                    |                  |
| <i>Baseline</i>    | 8.1±0.9            | 8.1±1.2          |
| <i>weeks 12</i>    | 4.1±2.1            | 4.7±1.8          |
| <i>weeks 24</i>    | 4.3±1.7            | 4.6±1.9          |
| <i>weeks 48</i>    | 4.8±1.9            | 4.7±2.0          |
| <i>Mean change</i> |                    |                  |
| <i>weeks 12</i>    | -4.0±2.2**         | -3.4±1.9**       |
| <i>weeks 24</i>    | -3.8±2.0**         | -3.5±2.0**       |
| <i>weeks 48</i>    | -3.4±2.2**         | -3.4±2.2**       |
| <b>HIT-6</b>       |                    |                  |
| <i>Baseline</i>    | 67.2±3.7           | 68.6±4.1         |
| <i>weeks 12</i>    | 49.1±15.5          | 46.1±21.3        |
| <i>weeks 24</i>    | 41.9±19.9          | 44.3±21.2        |
| <i>weeks 48</i>    | 50.3±9.3           | 50.7±12.3        |
| <i>Mean change</i> |                    |                  |
| <i>weeks 12</i>    | -18.1±15.5**       | -22.5±21.3**     |
| <i>weeks 24</i>    | -25.3±20.1**       | -24.3±21.6**     |
| <i>weeks 48</i>    | -16.9±9.2**        | -17.9±11.9**     |
| <b>MIDAS</b>       |                    |                  |
| <i>Baseline</i>    | 57.5±36.3          | 82.6±65.6        |
| <i>weeks 12</i>    | 10.5±13.6          | 15.0±20.7        |
| <i>weeks 24</i>    | 9.0±11.4           | 17.5±29.5        |
| <i>weeks 48</i>    | 7.1±16.1           | 6.0±13.6         |
| <i>Mean change</i> |                    |                  |

|                 |              |              |
|-----------------|--------------|--------------|
| <i>weeks 12</i> | -46.9±36.6** | -67.6±60.1** |
| <i>weeks 24</i> | -47.6±34.3** | -65.4±67.1** |
| <i>weeks 48</i> | -50.4±35.2** | -76.6±62.7** |

\*\*p<0.001
